# Supplementary material
Source: publisher figshare collection journal article supplement (https://tandf.figshare.com/articles/dataset/_/9742214)
Supplement: Supplementary file 1 [file 1]

Archive with 3 entries (3 files):
- Supplementary Figures_Caption.pdf
- ncer-2019-sc-0172-File006.TIF
- ncer-2019-sc-0172-File007.TIF
