# Supplementary material
Source: publisher figshare collection journal article supplement (https://tandf.figshare.com/articles/dataset/_/9742214)
Supplement: Supplementary file 1 [file 1 › Supplementary Figures_Caption.pdf]

### **Supplementary Figure 1 Quantification of avascular and neovascular area**

Identification of avascular retina and neovascular tufts. (A) Retinal flat mount from a mouse with oxygen-induced retinopathy. (B) The polygonal lasso tool was used to demarcate the area of avascular retina. (C) The magic wand tool was used to mark neovascular tufts.

### **Supplementary Figure 2 Quantitative real-time PCR for genes known to be expressed in OIR**

Quantitative real-time PCR confirms lack of gene expression of STC-1 in *Stc-1<sup>-/-</sup>* mice ( $P < 0.001$ )\*\*\* at P17. *Stc-1<sup>(-/-)</sup>* mice exposed to oxygen induced retinopathy (OIR) showed higher levels of CC3 compared to wild-type controls ( $P < 0.05$ ) at P17. There were no significant differences between wild-type and *Stc-1<sup>(-/-)</sup>* mice exposed to OIR for HIF-1 $\alpha$ , VEGFR2, TNF $\alpha$ , Cfb, C1qb, FGF2, TLR4, TNFAIP2, PGF, or CCL11 at P17. Error bars represent SEM.
