# Supplementary material
Source: publisher figshare collection journal article supplement (https://tandf.figshare.com/articles/dataset/_/9742214)

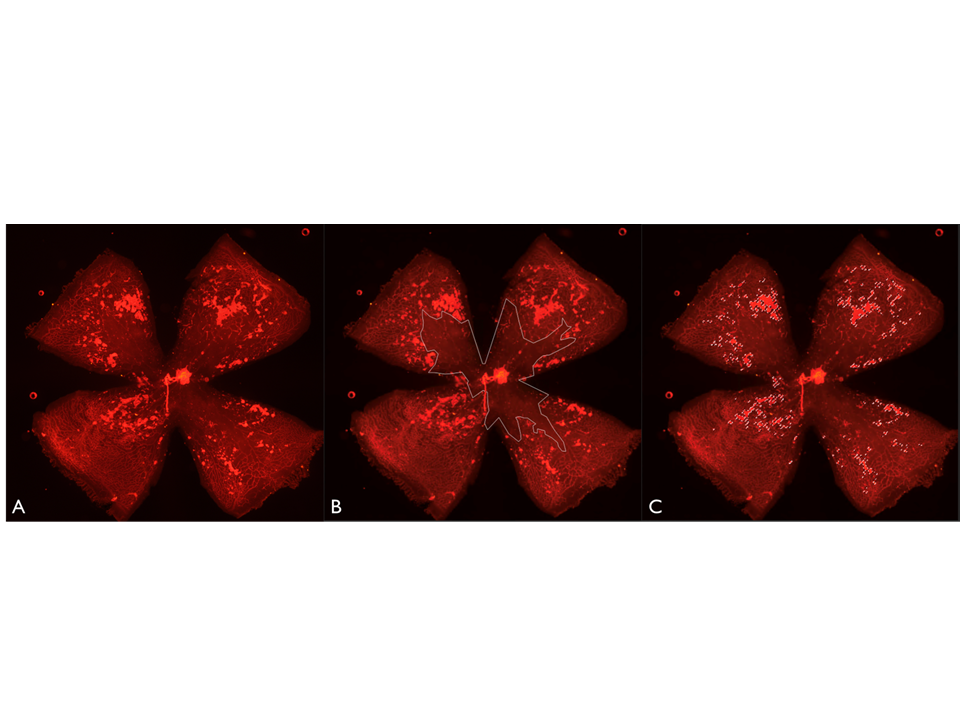

Supplement: Supplementary file 1 [file 1 › ncer-2019-sc-0172-File006.TIF]

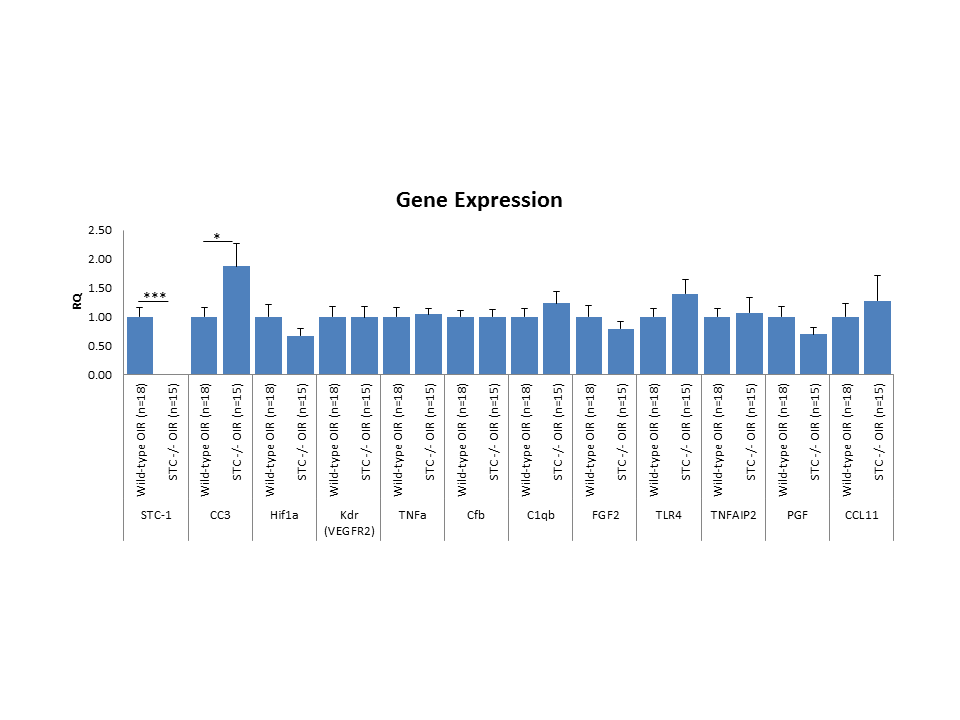

Supplement: Supplementary file 1 [file 1 › ncer-2019-sc-0172-File007.TIF]
